# Supplementary figures and images for: Allyl-, Butyl- and Phenylethyl-Isothiocyanate Modulate Akt–mTOR and Cyclin–CDK Signaling in Gemcitabine- and Cisplatin-Resistant Bladder Cancer Cell Lines
Source: MDPI journal article supplement (doi:10.3390/ijms231910996), 2022-09-20

# RT112 - AITC

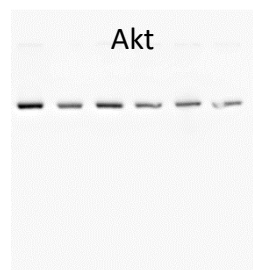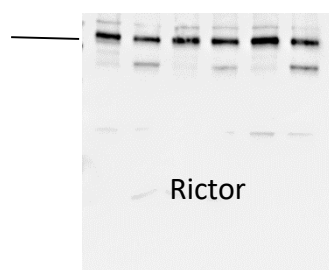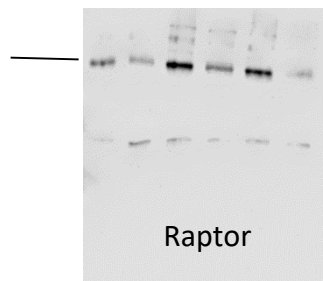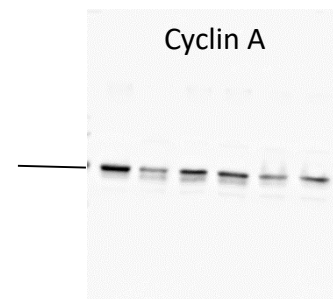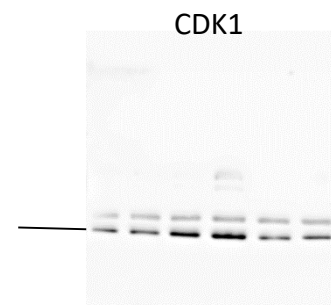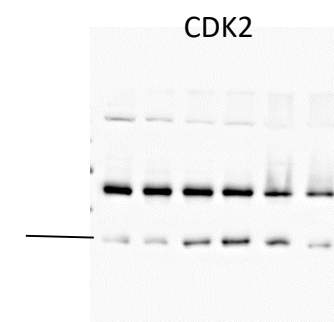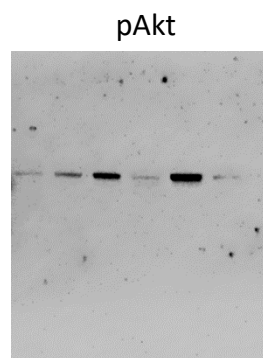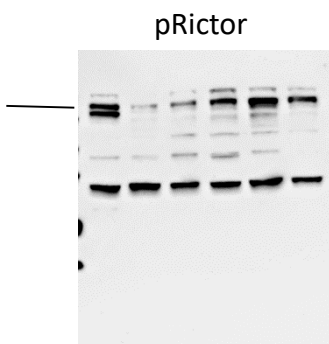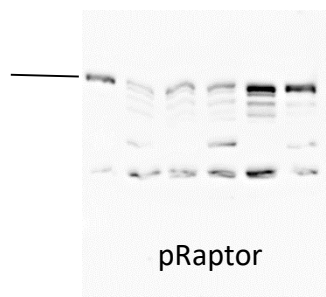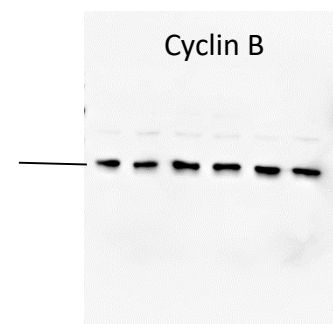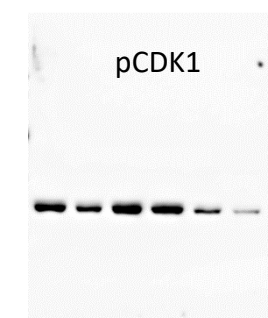

## RT112 – BITC, PEITC (Each: Control, BITC, PEITC)

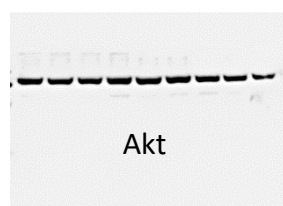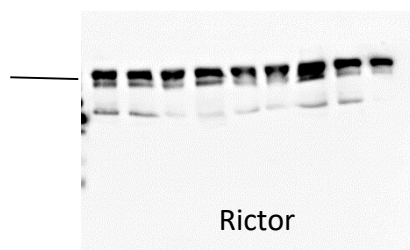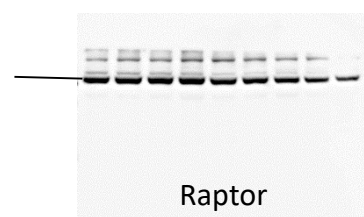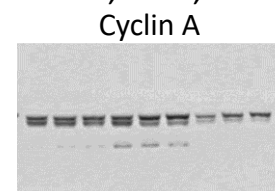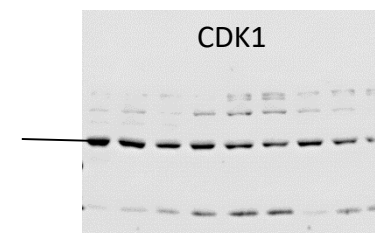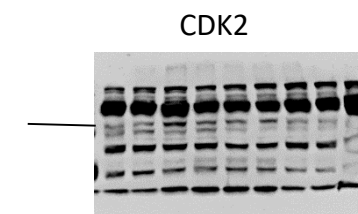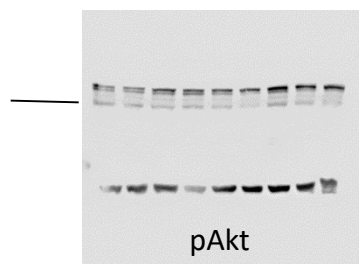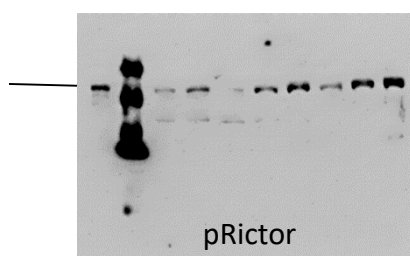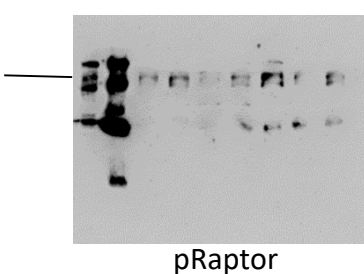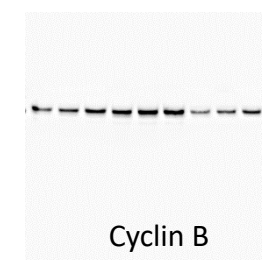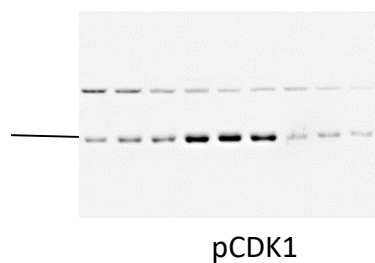

T24 - PEITC

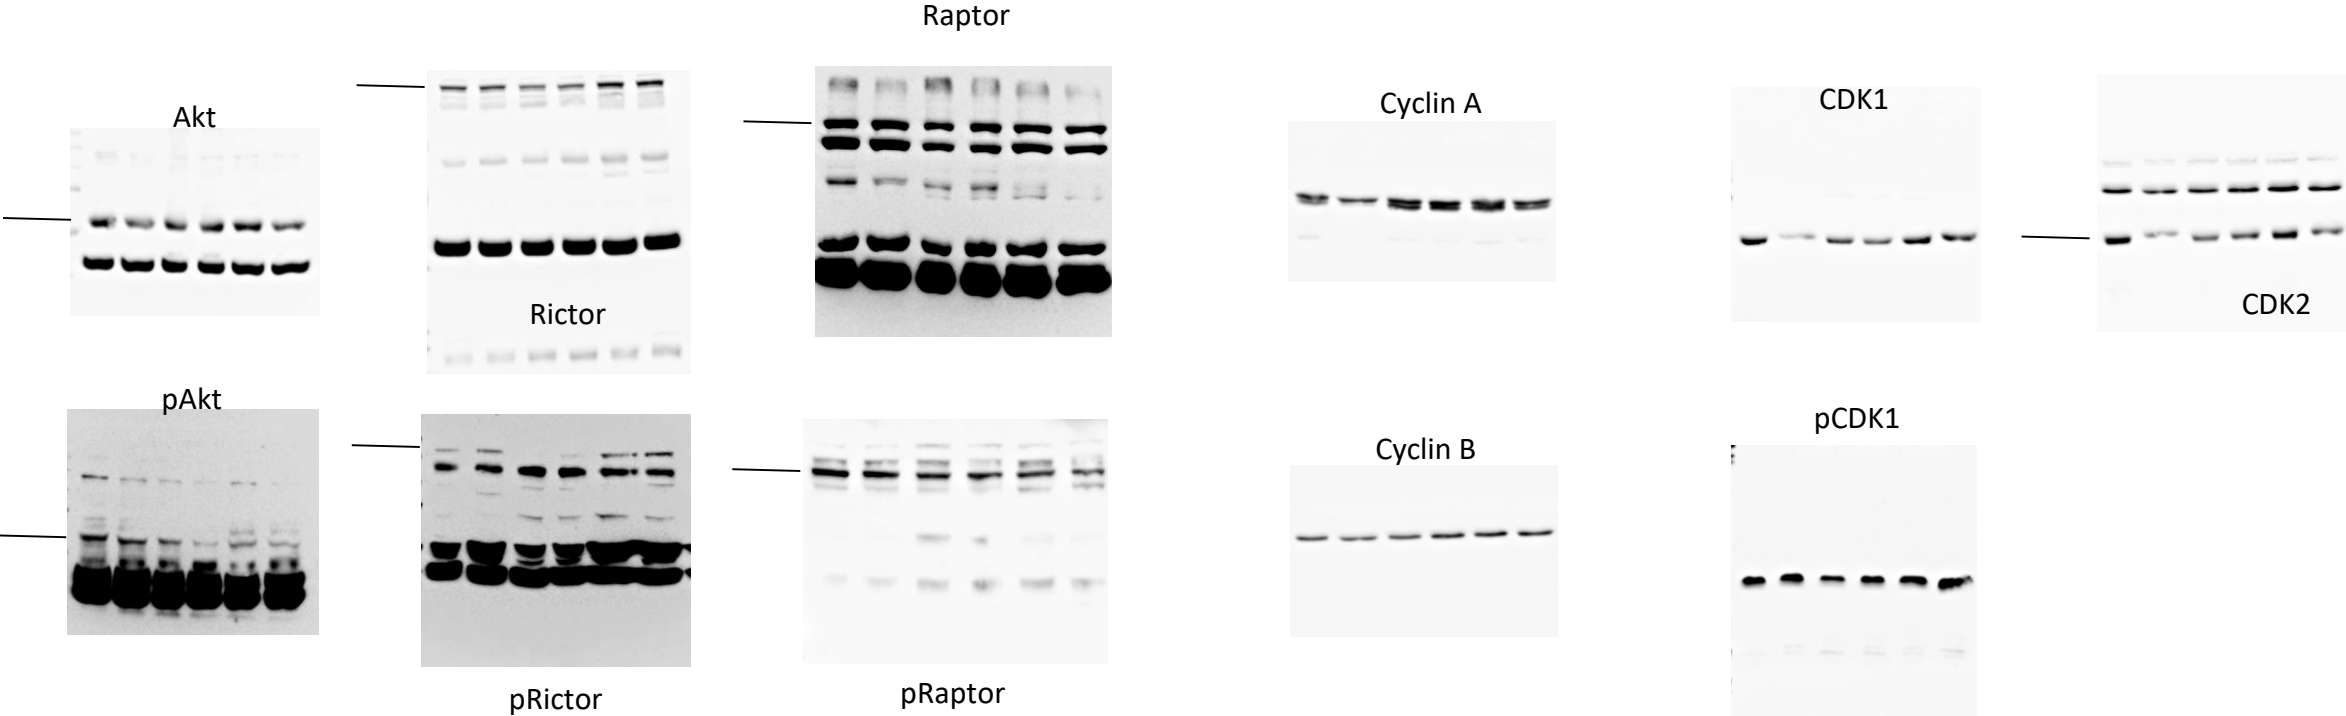

# T24 - BITC

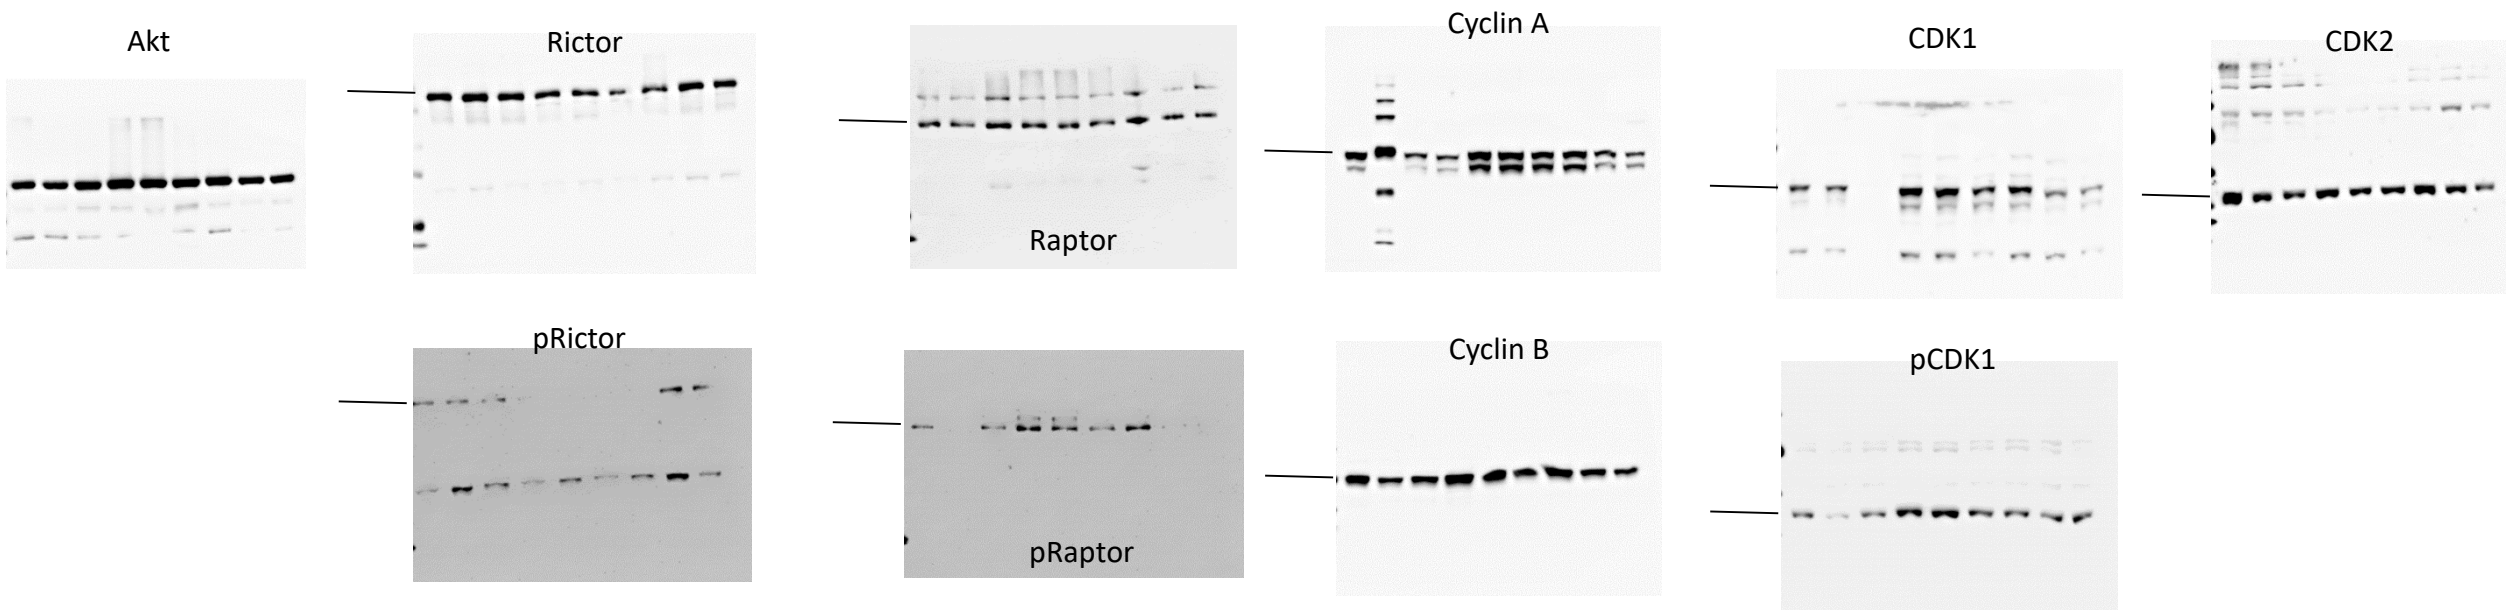

# T24 - AITC

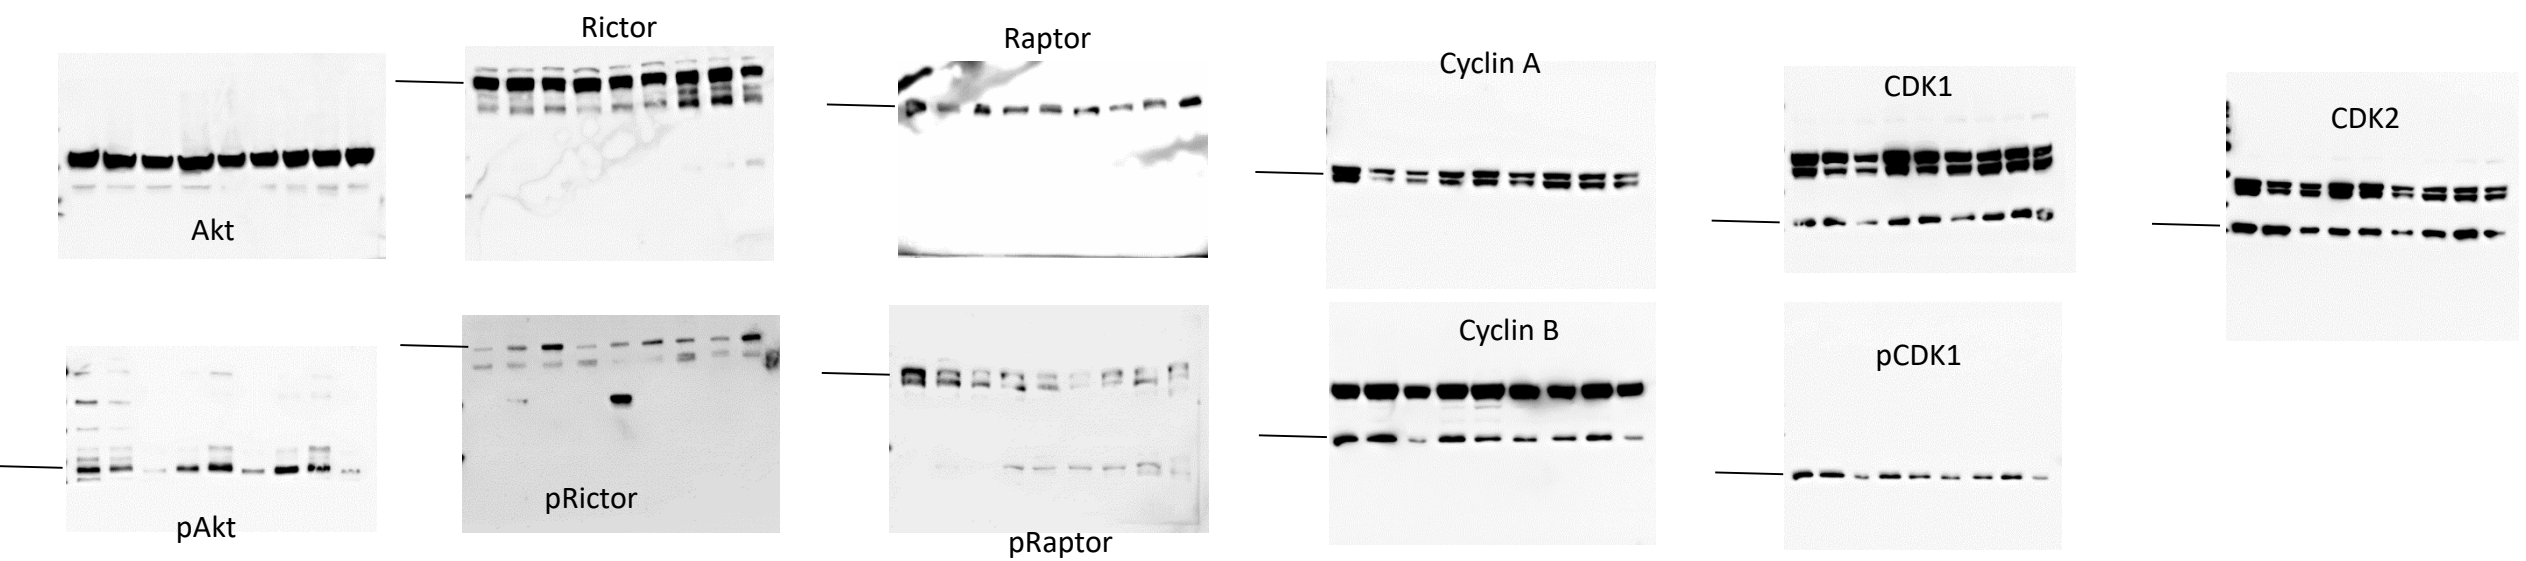

Figure S1: Western blots

Supplement: s1 [file s1]
